# Supplementary material for: Phosphorus supplementation raised the heart rate of male water polo players during a randomised graded dryland exercise test
Source: HighWire-hosted journal article supplement (doi:10.1136/bmjsem-2019-000714), 2020-04-01
Supplement: bmjsem-2019-000714supp001_data_supplement.xlsx [file bmjsem-2019-000714supp001_data_supplement.xlsx]

## Sheet: Exercise Efficiency
		Exercise Efficiency in %
						A-B						B-A
						placebo	phosphorus				phosphorus		placebo
	Placebo	Phosphorus			Subjects	X1	X2	sum	diff		Subjects	Y1	Y2	sum	diff
Subjects	AB	BA		AB1	1	21.69	22.65	44.34	-0.96	BA1	1	19.67	21.89	41.56	-2.22
N	m	n		AB2	2	19.43	20.28	39.71	-0.85	BA2	2	24.14	23.36	47.5	0.78
13	6	7		AB3	3	21.99	20.6	42.59	1.39	BA3	3	17.15	22.33	39.48	-5.18
				AB4	4	20.48	20.57	41.05	-0.09	BA4	4	20.4	17	37.4	3.4
				AB5	5	22.4	23.9	46.3	-1.5	BA5	5	21.37	21.59	42.96	-0.22
				AB6	6	26.75	24.26	51.01	2.49	BA6	6	18.06	18.74	36.8	-0.68
					7					BA7	7	19.83	17.9	37.73	1.93
					8						8
					9						9
					10						10
					11						11
					12						12
					Means	22.1233	22.0433	44.1667	0.08		Means	20.0886	20.4014	40.49	-0.312857
					SD	2.51566	1.794	4.08592	1.54894		SD	2.27836	2.47279	3.83379	2.81306
					SS	31.6427	16.0921	83.4737	11.996		SS	31.1455	36.6883	88.1878	47.4797
						Pre test to check assumption of negligible carryover effects
						T score	1.67289
						P value	0.123
						check online for p value calculation		https://www.socscistatistics.com/pvalues/tdistribution.aspx
						Test for Differences between treatment effects
						T score	0.303678
						P value	0.767

## Sheet: Energy Expenditure (EE) at Rest
		Energy Expenditure in kcal/min
						A-B						B-A
						placebo	phosphorus				phosphorus		placebo
	Placebo	Phosphorus			Subjects	X1	X2	sum	diff		Subjects	Y1	Y2	sum	diff
Subjects	AB	BA		AB1	1	2.02	2.2	4.22	-0.18	BA1	1	2.29	2.09	4.38	0.2
N	m	n		AB2	2	1.92	1.94	3.86	-0.02	BA2	2	1.93	2.37	4.3	-0.44
11	5	6		AB3	3	2.1	2.75	4.85	-0.65	BA3	3	1.47	1.46	2.93	0.01
				AB4	4	2.02	2.23	4.25	-0.21	BA4	4	1.9	1.87	3.77	0.03
				AB5	5	1.86	1.95	3.81	-0.09	BA5	5	2.06	1.96	4.02	0.1
					6					BA6	6	1.98	1.91	3.89	0.07
					7						7
					8						8
					9						9
					10						10
					11						11
					12						12
					Means	1.984	2.214	4.198	-0.23		Means	1.93833	1.94333	3.88167	-0.005
					SD	0.0942338	0.328831	0.416257	0.246475		SD	0.268732	0.297971	0.521667	0.223316
					SS	0.03552	0.43252	0.69308	0.243		SS	0.361083	0.443933	1.36068	0.24935
						Pre test to check assumption of negligible carryover effects
						T score	1.09359
						P value	0.302
						check online for p value calculation		https://www.socscistatistics.com/pvalues/tdistribution.aspx
						Test for Differences between treatment effects
						T score	-1.58866
						P value	0.146

## Sheet: EE at 75 Watts Workload
		Energy Expenditure in kcal/min
						A-B						B-A
						placebo	phosphorus				phosphorus		placebo
	Placebo	Phosphorus			Subjects	X1	X2	sum	diff		Subjects	Y1	Y2	sum	diff
Subjects	AB	BA		AB1	1	10.153	10.382	20.535	-0.229	BA1	1	9.51	8.47	17.98	1.04
N	m	n		AB2	2	8.05	7.8	15.85	0.25	BA2	2	7.58	7.98	15.56	-0.4
12	6	6		AB3	3	8.35	7.36	15.71	0.99	BA3	3	8.73	7.3	16.03	1.43
				AB4	4	8.2	8.33	16.53	-0.13	BA4	4	5.99	5.37	11.36	0.62
				AB5	5	8.18	8.22	16.4	-0.04	BA5	5	8.51	7.8	16.31	0.71
				AB6	6	7.27	6.92	14.19	0.35	BA6	6	8.76	7.88	16.64	0.88
					7						7
					8						8
					9						9
					10						10
					11						11
					12						12
					Means	8.36717	8.16867	16.5358	0.1985		Means	8.18	7.46667	15.6467	0.713333
					SD	0.954656	1.20636	2.12918	0.44713		SD	1.23877	1.09325	2.25394	0.615846
					SS	4.55684	7.27653	22.6671	0.999627		SS	7.6728	5.97593	25.4011	1.89633
						Pre test to check assumption of negligible carryover effects
						T score	0.702449
						P value	0.498
						check online for p value calculation		https://www.socscistatistics.com/pvalues/tdistribution.aspx
						Test for Differences between treatment effects
						T score	-1.65703
						P value	0.128

## Sheet: EE at 100 Watts
		Energy Expenditure in kcal/min
						A-B						B-A
						placebo	phosphorus				phosphorus		placebo
	Placebo	Phosphorus			Subjects	X1	X2	sum	diff		Subjects	Y1	Y2	sum	diff
Subjects	AB	BA		AB1	1	10.679	10.986	21.665	-0.307	BA1	1	10.67	10.05	20.72	0.62
N	m	n		AB2	2	10.1	9.06	19.16	1.04	BA2	2	9.67	9.58	19.25	0.09
12	6	6		AB3	3	10.26	9.01	19.27	1.25	BA3	3	10.18	9.33	19.51	0.85
				AB4	4	10.01	10.24	20.25	-0.23	BA4	4	7.13	6.81	13.94	0.32
				AB5	5	9.56	9.78	19.34	-0.22	BA5	5	9.76	9.89	19.65	-0.13
				AB6	6	8.75	8.6	17.35	0.15	BA6	6	9.95	9.49	19.44	0.46
					7						7
					8						8
					9						9
					10						10
					11						11
					12						12
					Means	9.89317	9.61267	19.5058	0.2805		Means	9.56	9.19167	18.7517	0.368333
					SD	0.667287	0.894621	1.41888	0.691385		SD	1.24303	1.1963	2.41374	0.355495
					SS	2.22636	4.00173	10.0661	2.39007		SS	7.7256	7.15568	29.1307	0.631883
						Pre test to check assumption of negligible carryover effects
						T score	0.659785
						P value	0.524
						check online for p value calculation		https://www.socscistatistics.com/pvalues/tdistribution.aspx
						Test for Differences between treatment effects
						T score	-0.276743
						P value	0.788

## Sheet: EE at 125 Watts 
		Energy Expenditure in kcal/min
						A-B						B-A
						placebo	phosphorus				phosphorus		placebo
	Placebo	Phosphorus			Subjects	X1	X2	sum	diff		Subjects	Y1	Y2	sum	diff
Subjects	AB	BA		AB1	1	11.636	11.756	23.392	-0.12	BA1	1	12.32	11.72	24.04	0.6
N	m	n		AB2	2	12.38	10.81	23.19	1.57	BA2	2	11.61	10.78	22.39	0.83
12	6	6		AB3	3	12.04	10.77	22.81	1.27	BA3	3	11.75	10.99	22.74	0.76
				AB4	4	11.57	11.9	23.47	-0.33	BA4	4	8.75	8.31	17.06	0.44
				AB5	5	11.27	11.12	22.39	0.15	BA5	5	11.58	11.53	23.11	0.05
				AB6	6	9.66	9.84	19.5	-0.18	BA6	6	11.95	11.71	23.66	0.24
					7						7
					8						8
					9						9
					10						10
					11						11
					12						12
					Means	11.426	11.0327	22.4587	0.393333		Means	11.3267	10.84	22.1667	0.486667
					SD	0.94816	0.75155	1.50404	0.81581		SD	1.29137	1.2988	2.57239	0.303029
					SS	4.49504	2.82413	11.3106	3.32773		SS	8.33813	8.4344	33.0859	0.459133
						Pre test to check assumption of negligible carryover effects
						T score	0.240032
						P value	0.815
						check online for p value calculation		https://www.socscistatistics.com/pvalues/tdistribution.aspx
						Test for Differences between treatment effects
						T score	-0.262698
						P value	0.798

## Sheet: EE at 150 Watts
		Energy Expenditure in kcal/min
						A-B						B-A
						placebo	phosphorus				phosphorus		placebo
	Placebo	Phosphorus			Subjects	X1	X2	sum	diff		Subjects	Y1	Y2	sum	diff
Subjects	AB	BA		AB1	1	12.733	12.892	25.625	-0.159	BA1	1	13.91	13.03	26.94	0.88
N	m	n		AB2	2	13.44	13.11	26.55	0.33	BA2	2	13.9	12.56	26.46	1.34
12	6	6		AB3	3	13.19	12.57	25.76	0.62	BA3	3	13.15	12.67	25.82	0.48
				AB4	4	13.73	13.59	27.32	0.14	BA4	4	10.21	9.52	19.73	0.69
				AB5	5	12.94	12.77	25.71	0.17	BA5	5	13.73	13.72	27.45	0.01
				AB6	6	11.44	11.43	22.87	0.01	BA6	6	14.11	13.81	27.92	0.3
					7						7
					8						8
					9						9
					10						10
					11						11
					12						12
					Means	12.9122	12.727	25.6392	0.185167		Means	13.1683	12.5517	25.72	0.616667
					SD	0.803094	0.724899	1.50618	0.268872		SD	1.48591	1.57368	3.02519	0.465818
					SS	3.2248	2.62739	11.3429	0.361461		SS	11.0397	12.3823	45.759	1.08493
						Pre test to check assumption of negligible carryover effects
						T score	-0.0585903
						P value	0.954
						check online for p value calculation		https://www.socscistatistics.com/pvalues/tdistribution.aspx
						Test for Differences between treatment effects
						T score	-1.96516
						P value	0.078
