# Supplementary material for: Phosphorus supplementation raised the heart rate of male water polo players during a randomised graded dryland exercise test
Source: HighWire-hosted journal article supplement (doi:10.1136/bmjsem-2019-000714), 2020-04-01
Supplement: bmjsem-2019-000714supp002_data_supplement.xlsx [file bmjsem-2019-000714supp002_data_supplement.xlsx]

## Sheet: Avergae heart rate (HR)
		Heart Rate in Beats per Minute
						A-B						B-A
						placebo	phosphorus				phosphorus		placebo
	Placebo	Phosphorus			Subjects	X1	X2	sum	diff		Subjects	Y1	Y2	sum	diff
Subjects	AB	BA		AB1	1	134.16	143.72	277.88	-9.56	BA1	1	127.56	121.39	248.95	6.17
N	m	n		AB2	2	142.59	146.67	289.26	-4.08	BA2	2	154.4	146.1	300.5	8.3
11	4	7		AB3	3	127.2	135.5	262.7	-8.3	BA3	3	148.4	144	292.4	4.4
				AB4	4	129.43	137.83	267.26	-8.4	BA4	4	152.15	141.2	293.35	10.95
					5					BA5	5	134.8	127.75	262.55	7.05
					6					BA6	6	150.89	148.25	299.14	2.64
					7					BA7	7	130.54	126.12	256.66	4.42
					8						8
					9						9
					10						10
					11						11
					12						12
					Means	133.345	140.93	274.275	-7.585		Means	142.677	136.401	279.079	6.27571
					SD	6.81231	5.15838	11.8425	2.40563		SD	11.2934	10.9629	22.0831	2.79099
					SS	139.222	79.8266	420.737	17.3611		SS	765.25	721.113	2925.99	46.7378
						Pre test to check assumption of negligible carryover effects
						T score	-0.397428
						P value	0.7006
						check online for p value calculation		https://www.socscistatistics.com/pvalues/tdistribution.aspx
						Test for Differences between treatment effects
						T score	-8.28637
						P value	1.7e-05

## Sheet: HR fasted
HR		Heart Rate in Beats per Minute
						A-B						B-A
						placebo	phosphorus				phosphorus		placebo
	Placebo	Phosphorus			Subjects	X1	X2	sum	diff		Subjects	Y1	Y2	sum	diff
Subjects	AB	BA		AB1	1	66	71	137	-5	BA1	1	64	62	126	2
N	m	n		AB2	2	79	81	160	-2	BA2	2	77	78	155	-1
11	4	7		AB3	3	71	78	149	-7	BA3	3	74	72	146	2
				AB4	4	75	71	146	4	BA4	4	76	71	147	5
					5					BA5	5	74	79	153	-5
					6					BA6	6	66	70	136	-4
					7					BA7	7	80	76	156	4
					8						8
					9						9
					10						10
					11						11
					12						12
					Means	72.75	75.25	148	-2.5		Means	73	72.5714	145.571	0.428571
					SD	5.56028	5.058	9.48683	4.79583		SD	5.85947	5.82687	11.0281	3.86683
					SS	92.75	76.75	270	69		SS	206	203.714	729.714	89.7143
						Pre test to check assumption of negligible carryover effects
						T score	0.367635
						P value	0.722
						check online for p value calculation		https://www.socscistatistics.com/pvalues/tdistribution.aspx
						Test for Differences between treatment effects
						T score	-1.11263
						P value	0.294

## Sheet: HR at rest after 3 h
		Heart Rate in Beats per Minute
						A-B						B-A
						placebo	phosphorus				phosphorus		placebo
	Placebo	Phosphorus			Subjects	X1	X2	sum	diff		Subjects	Y1	Y2	sum	diff
Subjects	AB	BA		AB1	1	66.4	70.5	136.9	4.1	BA1	1	64	62	126	2
N	m	n		AB2	2	85.8	91	176.8	-5.2	BA2	2	77	78	155	-1
11	4	7		AB3	3	73.4	89	162.4	-15.6	BA3	3	74	72	146	2
				AB4	4	74.6	80.4	155	-5.8	BA4	4	76	71	147	5
					5					BA5	5	74	79	153	-5
					6					BA6	6	79.8	77.1	156.9	2.7
					7					BA7	7	63.5	65.8	129.3	-2.3
					8						8
					9						9
					10						10
					11						11
					12						12
					Means	75.05	82.725	157.775	-5.625		Means	72.6143	72.1286	144.743	0.485714
					SD	8.02725	9.35784	16.6013	8.04752		SD	6.36983	6.45929	12.3669	3.41391
					SS	193.31	262.707	826.808	194.287		SS	243.449	250.334	917.637	69.9286
						Pre test to check assumption of negligible carryover effects
						T score	1.49345
						P value	0.17
						check online for p value calculation		https://www.socscistatistics.com/pvalues/tdistribution.aspx
						Test for Differences between treatment effects
						T score	-1.79935
						P value	0.105

## Sheet: HR at 75 W workload
		Heart Rate in Beats per Minute
						A-B						B-A
						placebo	phosphorus				phosphorus		placebo
	Placebo	Phosphorus			Subjects	X1	X2	sum	diff		Subjects	Y1	Y2	sum	diff
Subjects	AB	BA		AB1	1	115	127	242	-12	BA1	1	110	104	214	6
N	m	n		AB2	2	119	122	241	-3	BA2	2	132	123	255	9
11	4	7		AB3	3	103	115	218	-12	BA3	3	120	115	235	5
				AB4	4	111	128	239	-17	BA4	4	121	119	240	2
					5					BA5	5	111	108	219	3
					6					BA6	6	125	101	226	24
					7					BA7	7	100	100	200	0
					8						8
					9						9
					10						10
					11						11
					12						12
					Means	112	123	235	-11		Means	117	110	227	7
					SD	6.8313	5.94418	11.4018	5.83095		SD	10.7083	9.09212	18.1659	8.04156
					SS	140	106	390	102		SS	688	496	1980	388
						Pre test to check assumption of negligible carryover effects
						T score	0.786538
						P value	0.452
						check online for p value calculation		https://www.socscistatistics.com/pvalues/tdistribution.aspx
						Test for Differences between treatment effects
						T score	-3.89205
						P value	0.0036

## Sheet: HR at 100 W 
		Heart Rate in Beats per Minute
						A-B						B-A
						placebo	phosphorus				phosphorus		placebo
	Placebo	Phosphorus			Subjects	X1	X2	sum	diff		Subjects	Y1	Y2	sum	diff
Subjects	AB	BA		AB1	1	127	137	264	-10	BA1	1	120	117	237	3
N	m	n		AB2	2	131	135	266	-4	BA2	2	146	135	281	11
11	4	7		AB3	3	119	129	248	-10	BA3	3	137	134	271	3
				AB4	4	123	134	257	-11	BA4	4	144	136	280	8
					5					BA5	5	128	122	250	6
					6					BA6	6	144	141	285	3
					7					BA7	7	121	119	240	2
					8						8
					9						9
					10						10
					11						11
					12						12
					Means	125	133.75	258.75	-8.75		Means	134.286	129.143	263.429	5.14286
					SD	5.16398	3.40343	8.13941	3.20156		SD	11.2059	9.54688	20.5496	3.33809
					SS	80	34.75	198.75	30.75		SS	753.429	546.857	2533.71	66.8571
						Pre test to check assumption of negligible carryover effects
						T score	-0.428391
						P value	0.678
						check online for p value calculation		https://www.socscistatistics.com/pvalues/tdistribution.aspx
						Test for Differences between treatment effects
						T score	-6.73061
						P value	8.6e-05

## Sheet: HR at 125 W
		Heart Rate in Beats per Minute
						A-B						B-A
						placebo	phosphorus				phosphorus		placebo
	Placebo	Phosphorus			Subjects	X1	X2	sum	diff		Subjects	Y1	Y2	sum	diff
Subjects	AB	BA		AB1	1	138	148	286	-10	BA1	1	131	128	259	3
N	m	n		AB2	2	147	151	298	-4	BA2	2	162	154	316	8
11	4	7		AB3	3	136	140	276	-4	BA3	3	154	149	303	5
				AB4	4	134	144	278	-10	BA4	4	163	149	312	14
					5					BA5	5	144	134	278	10
					6					BA6	6	161	160	321	1
					7					BA7	7	140	134	274	6
					8						8
					9						9
					10						10
					11						11
					12						12
					Means	138.75	145.75	284.5	-7		Means	150.714	144	294.714	6.71429
					SD	5.7373	4.78714	9.98332	3.4641		SD	12.5395	11.9861	24.1365	4.38613
					SS	98.75	68.75	299	36		SS	943.429	862	3495.43	115.429
						Pre test to check assumption of negligible carryover effects
						T score	-0.793668
						P value	0.448
						check online for p value calculation		https://www.socscistatistics.com/pvalues/tdistribution.aspx
						Test for Differences between treatment effects
						T score	-5.33425
						P value	0.00047

## Sheet: HR at 150 W
		Heart Rate in Beats per Minute
						A-B						B-A
						placebo	phosphorus				phosphorus		placebo
	Placebo	Phosphorus			Subjects	X1	X2	sum	diff		Subjects	Y1	Y2	sum	diff
Subjects	AB	BA		AB1	1	158	163	321	-5	BA1	1	150	141	291	9
N	m	n		AB2	2	174	179	353	-5	BA2	2	178	172	350	6
11	4	7		AB3	3	151	158	309	-7	BA3	3	184	178	362	6
				AB4	4	150	153	303	-3	BA4	4	174	161	335	13
					5					BA5	5	156	147	303	9
					6					BA6	6	174	175	349	-1
					7					BA7	7	161	152	313	9
					8						8
					9						9
					10						10
					11						11
					12						12
					Means	158.25	163.25	321.5	-5		Means	168.143	160.857	329	7.28571
					SD	11.0868	11.2657	22.2935	1.63299		SD	12.549	14.6222	26.9011	4.34796
					SS	368.75	380.75	1491	8		SS	944.857	1282.86	4342	113.429
						Pre test to check assumption of negligible carryover effects
						T score	-0.470023
						P value	0.649
						check online for p value calculation		https://www.socscistatistics.com/pvalues/tdistribution.aspx
						Test for Differences between treatment effects
						T score	-5.33634
						P value	0.00047
